# Supplementary material
Source: MDPI journal article supplement (https://www.mdpi.com/2073-4441/10/10/1489)
Supplement: s1 [file s1]

# The Optimal Width and Mechanism of Riparian Buffers for Storm Water Nutrient Removal in the Chinese Eutrophic Lake Chaohu Watershed

Supplementary materials

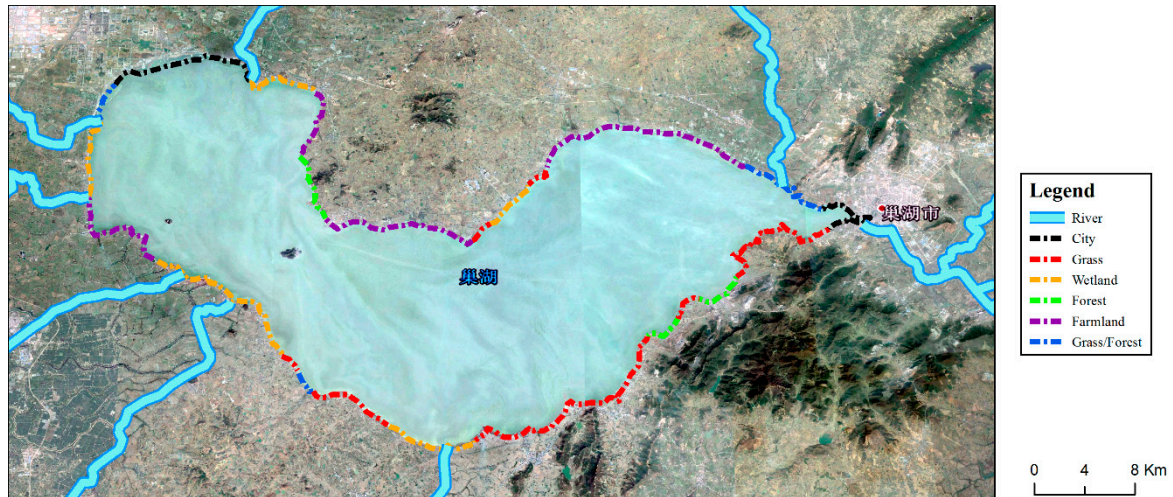

**Figure S1.** The distribution of different land use types in the littoral zone around Lake Chaohu.

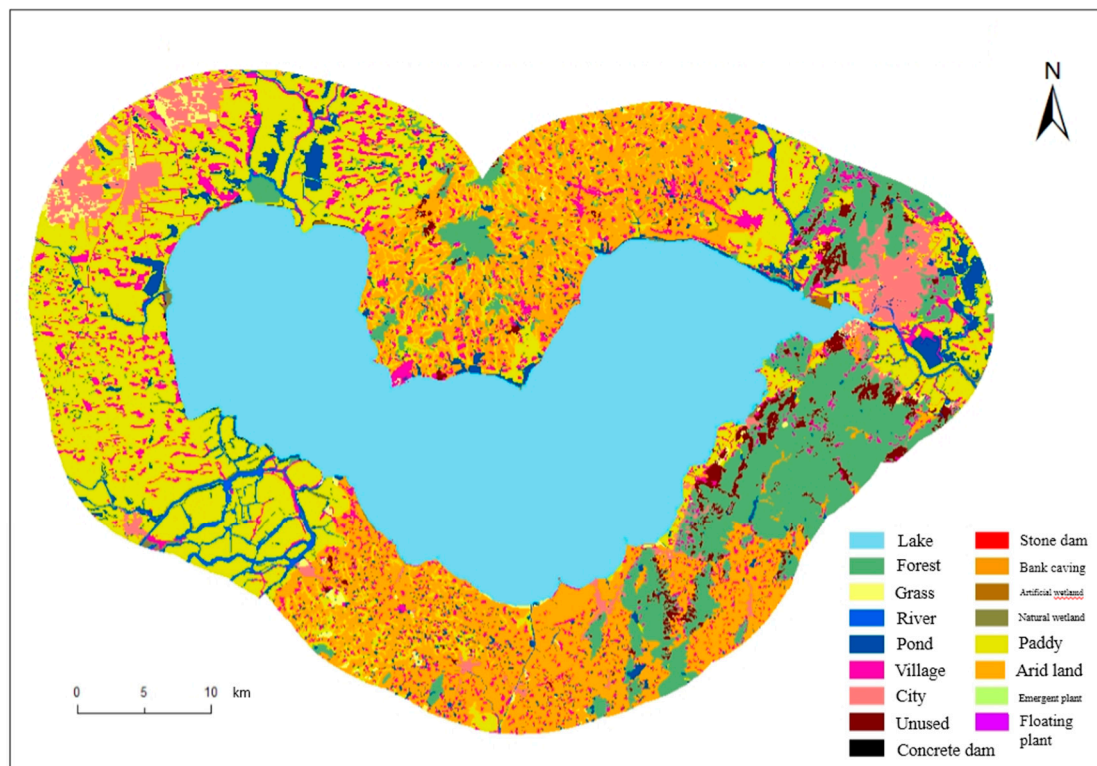

**Figure S2.** The distribution of different land use types in the riparian buffer zone with a width of 10 km from the shoreline around Lake Chaohu.
